# Supplementary material
Source: PubMed Central journal article supplement (PMC9898159)
Supplement: NIHMS1859417-supplement-Supplemental_Figure.pdf [file NIHMS1859417-supplement-Supplemental_Figure.pdf]

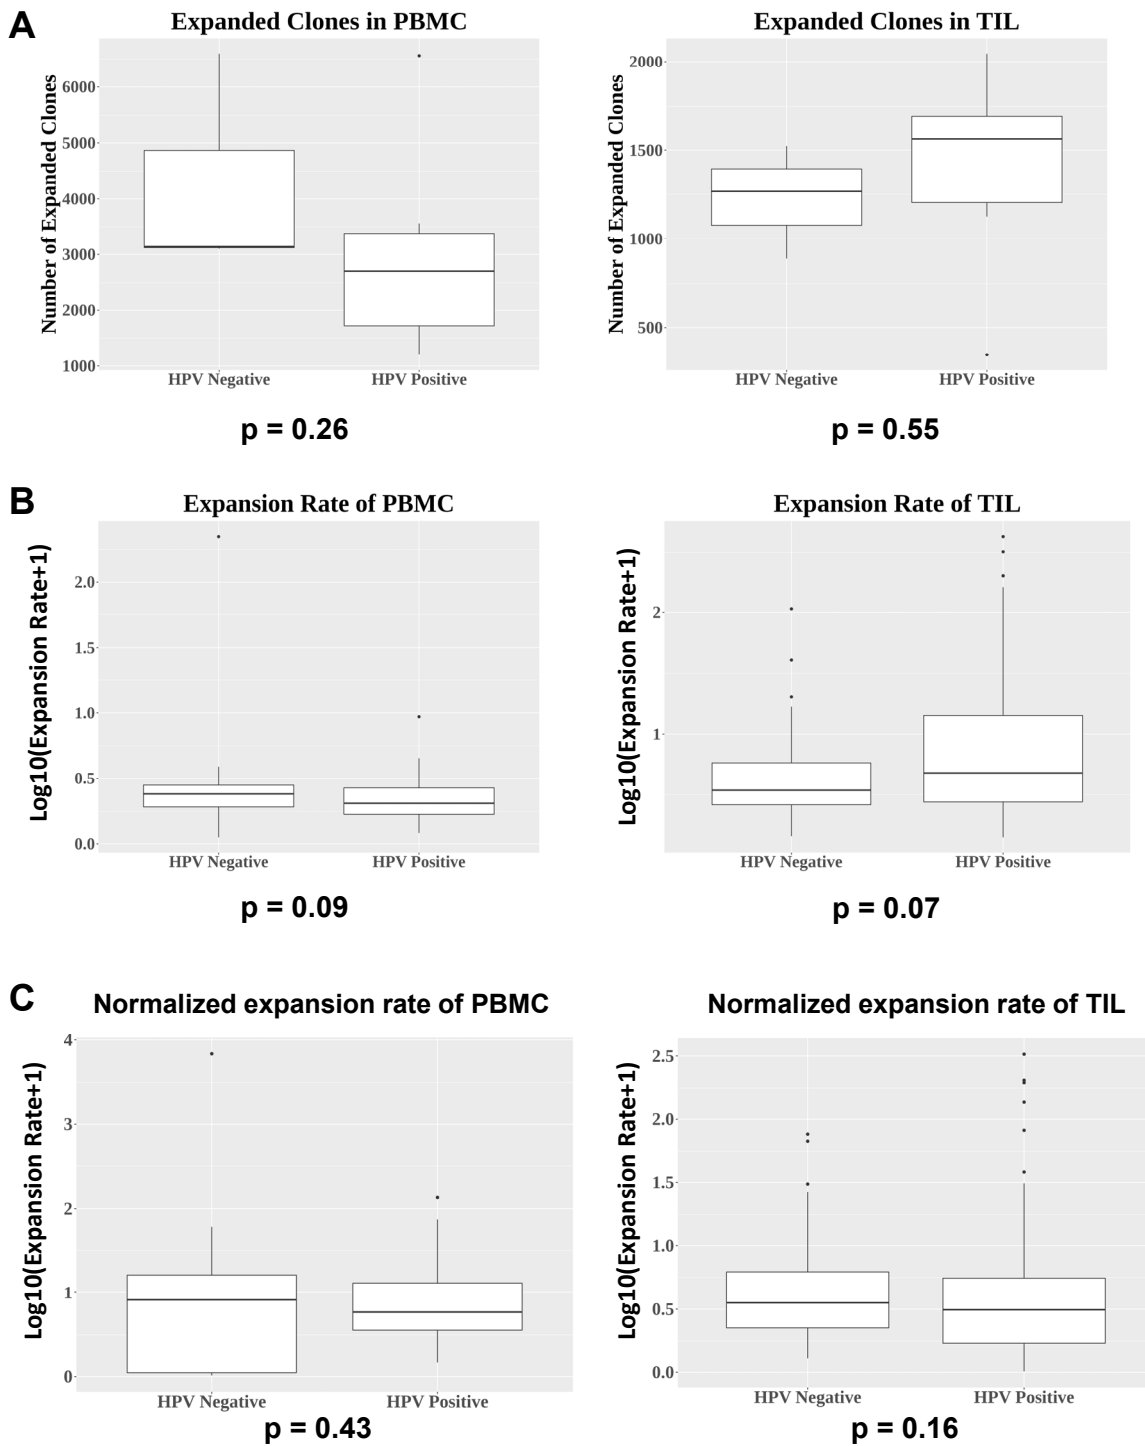

**Wilcoxon Rank Sum Test**

**Supplemental Figure 1. No correlation between top TCR clonotype expansion and HPV status.** (A) Numbers of all expanded clones in PBMC or TIL between HPV positive (n=6) (Patient 6, 13, 18, 19, 20, 21) and HPV negative (n=3) (patient 10, 14, 16). Expanded clones were calculated by comparing the clonal frequency of a given TCR clone between pre-PBMC vs. post-PBMC or pre-TIL vs. post-TIL. (B) Comparison of expansion rate of expanded top 20 TCR clonotypes without normalization between HPV positive (n=6) and HPV negative (n=3) in PBMC (p=0.09) or TIL (p=0.07). (C) Comparison of expansion rate of expanded top 20 TCR clonotypes between HPV positive (n=6) and HPV negative (n=3) in PBMC (p=0.43) or TIL (p=0.16) normalized by the sum of frequency of singleton clonotypes. Differences between two independent groups were calculated by Wilcoxon rank sum test.

**A**

|    | Containing Overlapped Clones | Not containing |
|----|------------------------------|----------------|
| R  | 5                            | 0              |
| NR | 9                            | 0              |

P=1  
Fisher Exact Test

**B**

|    | Overlapped Expanded Clones | Others |
|----|----------------------------|--------|
| R  | 768                        | 602067 |
| NR | 1166                       | 769884 |

P=0.0002  
Chi-square Test

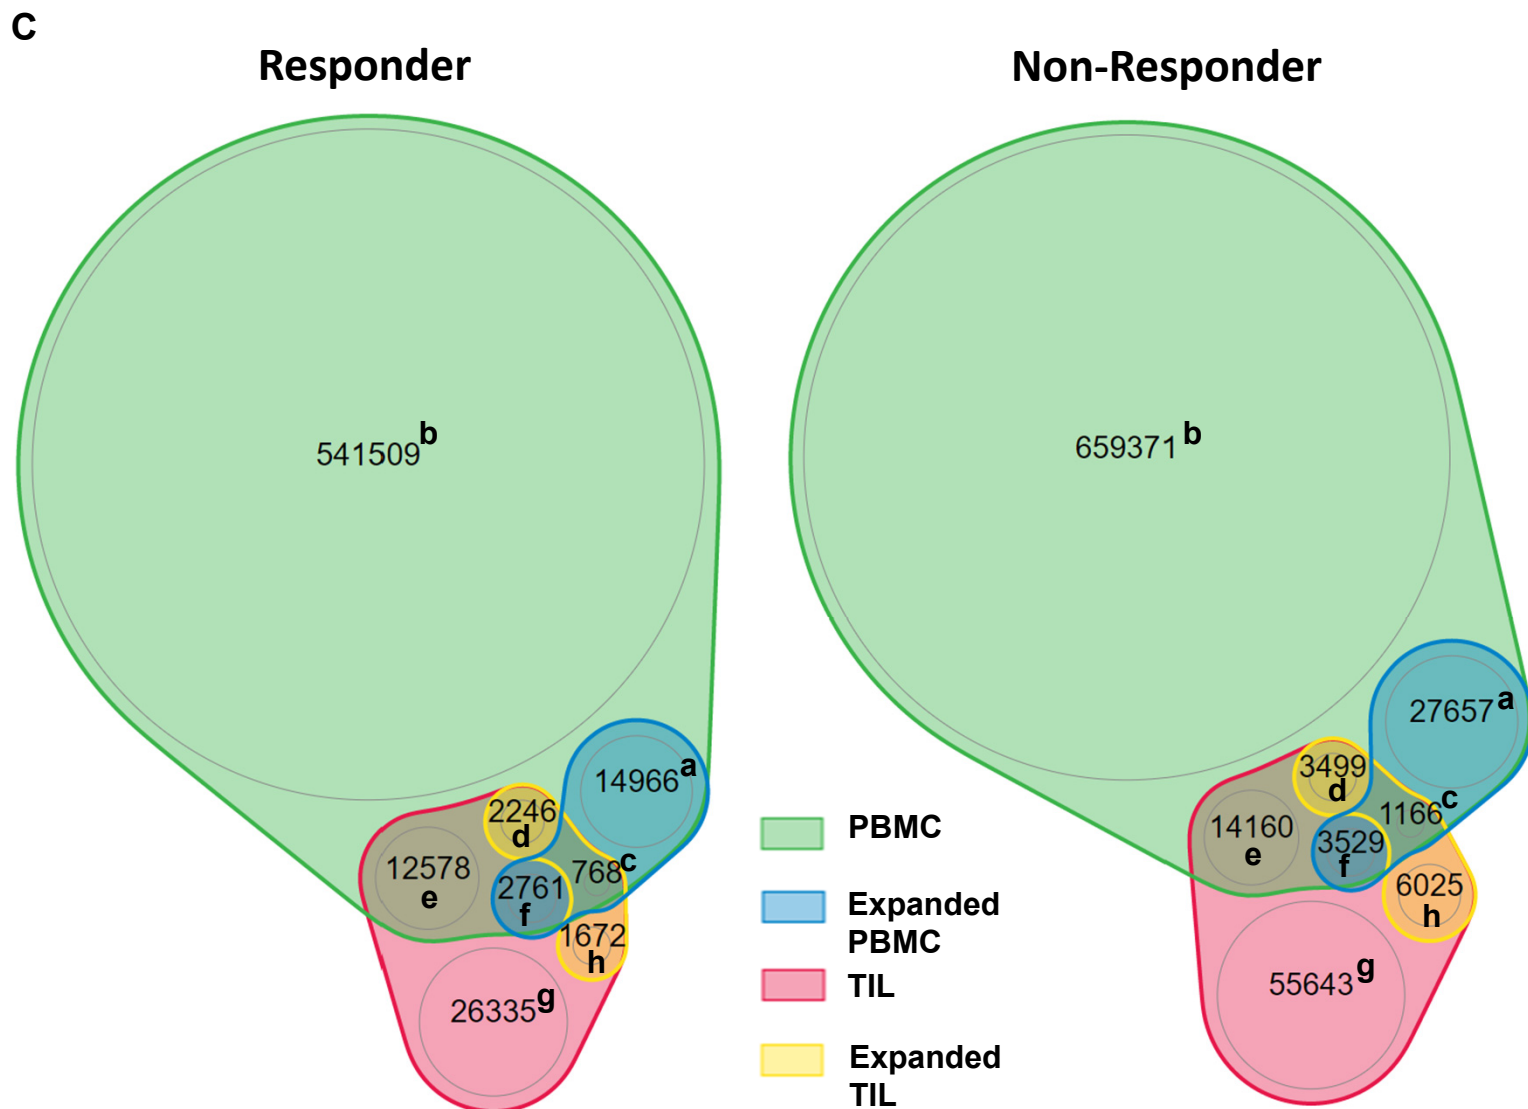

**Supplemental Figure 2. Overlapping expanded TCR clonotypes between PBMC and TIL counting all TCR clonotypes.** (A) Number of responders (n=5) or non-responders (n=9) containing or not containing an overlapping expanded TCR clonotype. Statistical difference was calculated with Fisher Exact Test ( $p=1$ ). (B) Number of overlapping expanded vs. others in all TCR clonotypes of responders (n=5) vs. non-responders (n=9). Others are counted as follows: the total number of TCR clonotypes in PBMC and TIL of responders or non-responders minus the number of clonotypes in category of c, d, e, and f and the number of clonotypes in c. Statistical difference was calculated with Chi-square test ( $p=0.0002$ ). (C) Number of TCR clonotypes in responders vs. non-responders distributed into 8 different categories (a-h) for expanding or overlapping conditions between PBMC and TIL. Annotation: (a) PBMC Expanded alone; (b) PBMC Nonexpanded; (c) PBMC Expanded & TIL Expanded; (d) PBMC Nonexpanded & TIL Expanded; (e) PBMC Nonexpanded & TIL Nonexpanded; (f) PBMC Expanded & TIL Nonexpanded; (g) TIL Nonexpanded; (h) TIL Expanded alone.

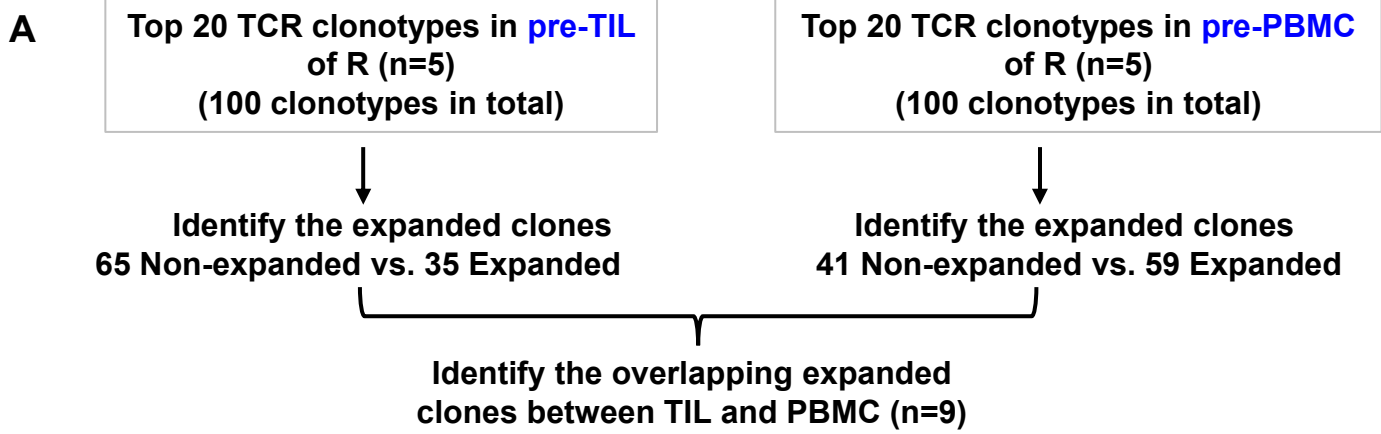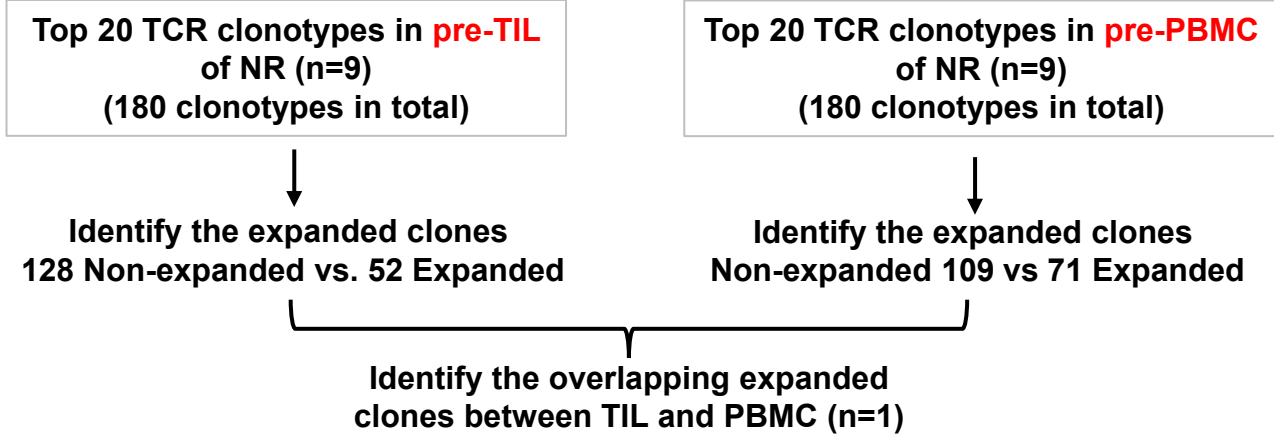

**B**

|    | Containing Top 20 Overlapped Clones | Not containing |
|----|-------------------------------------|----------------|
| R  | 3                                   | 2              |
| NR | 1                                   | 8              |

P=0.095 Fisher Exact Test

**C**

|    | Overlapped Expanded top 20 Clones | Others |
|----|-----------------------------------|--------|
| R  | 9                                 | 162    |
| NR | 1                                 | 332    |

P=0.0004 Fisher Exact Test

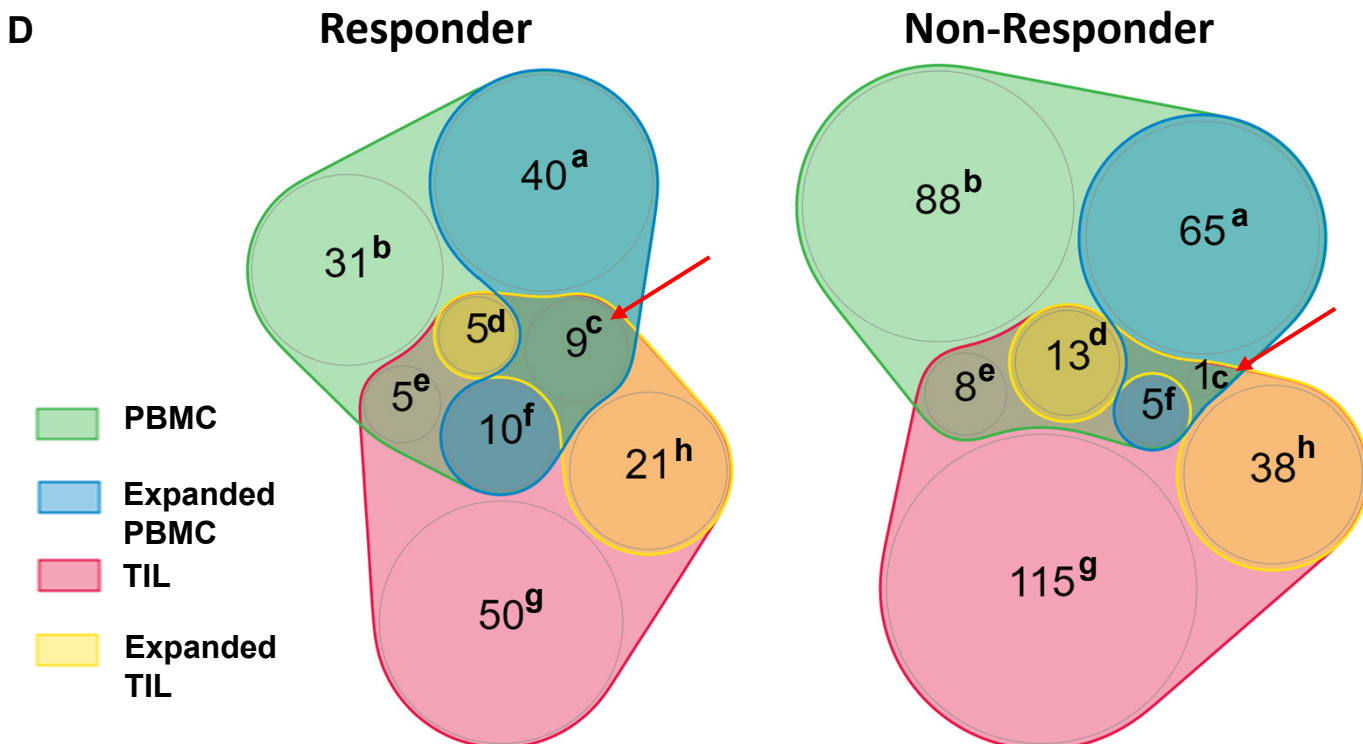

Supplemental Figure 3A-D

**Supplemental Figure 3. Overlapping expanded top 20 TCR clonotypes between TIL and PBMC.** **(A)** Scheme for identification and comparison of overlapping expanded top 20 TCR clonotypes based on their ranking in pre-TIL and pre-PBMC. **(B)** Number of responders (n=5) or non-responders (n=9) containing or not containing an overlapping expanded top 20 TCR clonotype. Statistical difference was calculated with Fisher Exact Test (p= 0.095). **(C)** Number of overlapping expanded vs. others in top 20 TCR clonotypes of responders (n=5) vs. non-responders (n=9). Others are counted as follows: the total number of top 20 TCR clonotypes in PBMC and TIL of responders (n=200) or non-responders (n=360) minus the number of clonotypes in category of c, d, e, and f and the number of clonotypes in category of c. Statistical difference was calculated with Fisher Exact Test (p=0.0004). **(D)** Number of TCR clonotypes in responders vs. non-responders distributed into 8 different categories **(a-h)** for expanding or overlapping conditions between PBMC and TIL. Annotation: **(a)** PBMC Expanded alone; **(b)** PBMC Nonexpanded; **(c)** PBMC Expanded & TIL Expanded; **(d)** PBMC Nonexpanded & TIL Expanded; **(e)** PBMC Nonexpanded & TIL Nonexpanded; **(f)** PBMC Expanded & TIL Nonexpanded; **(g)** TIL Nonexpanded; **(h)** TIL Expanded alone.

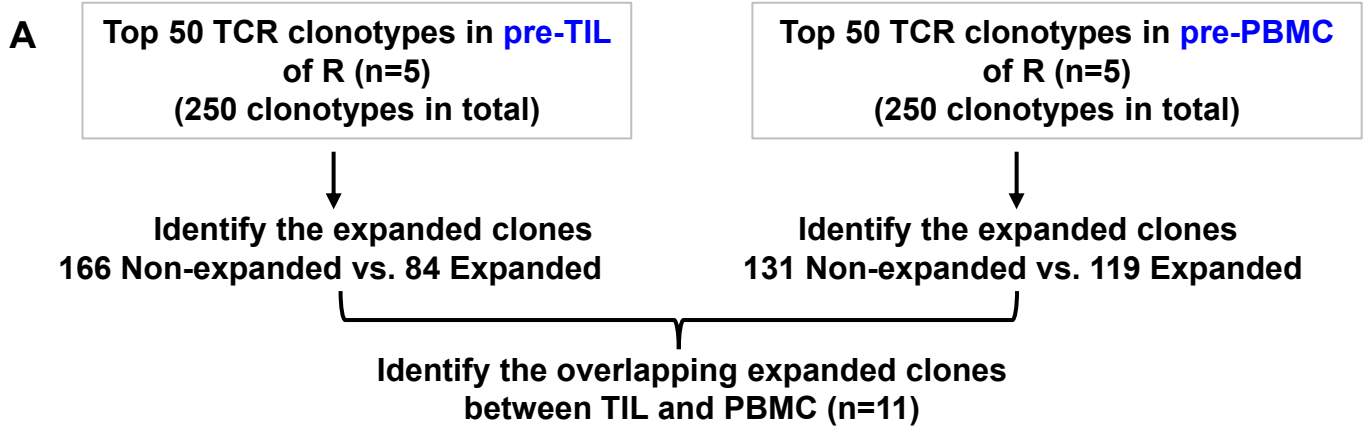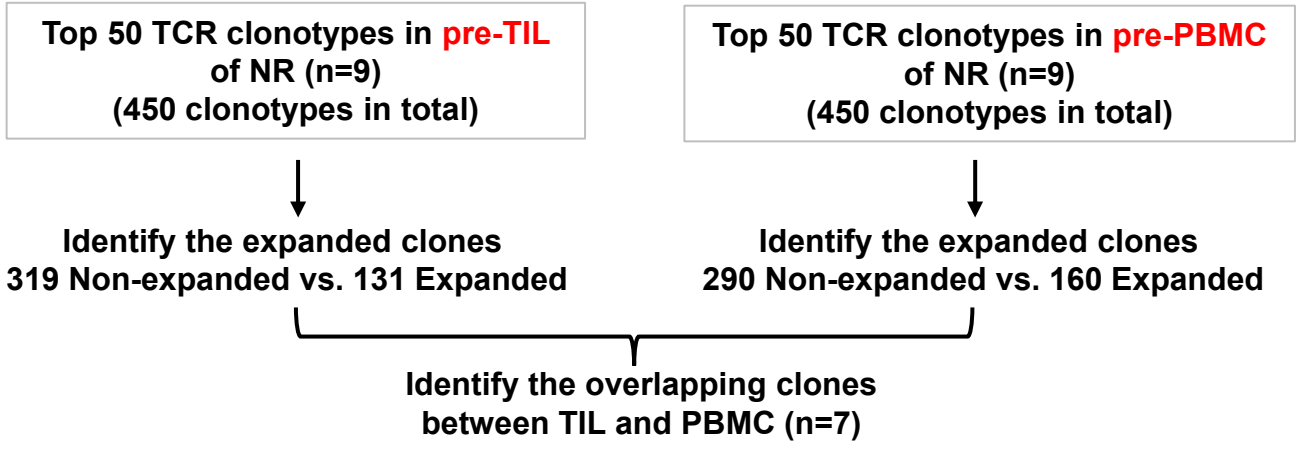

**B**

|    | Containing Top 20 Overlapped Clones | Not containing |
|----|-------------------------------------|----------------|
| R  | 3                                   | 2              |
| NR | 5                                   | 4              |

P=1 Fisher Exact Test

**C**

|    | Overlapped Expanded top 20 Clones | Others |
|----|-----------------------------------|--------|
| R  | 11                                | 425    |
| NR | 7                                 | 825    |

P=0.03 Chi-square Test

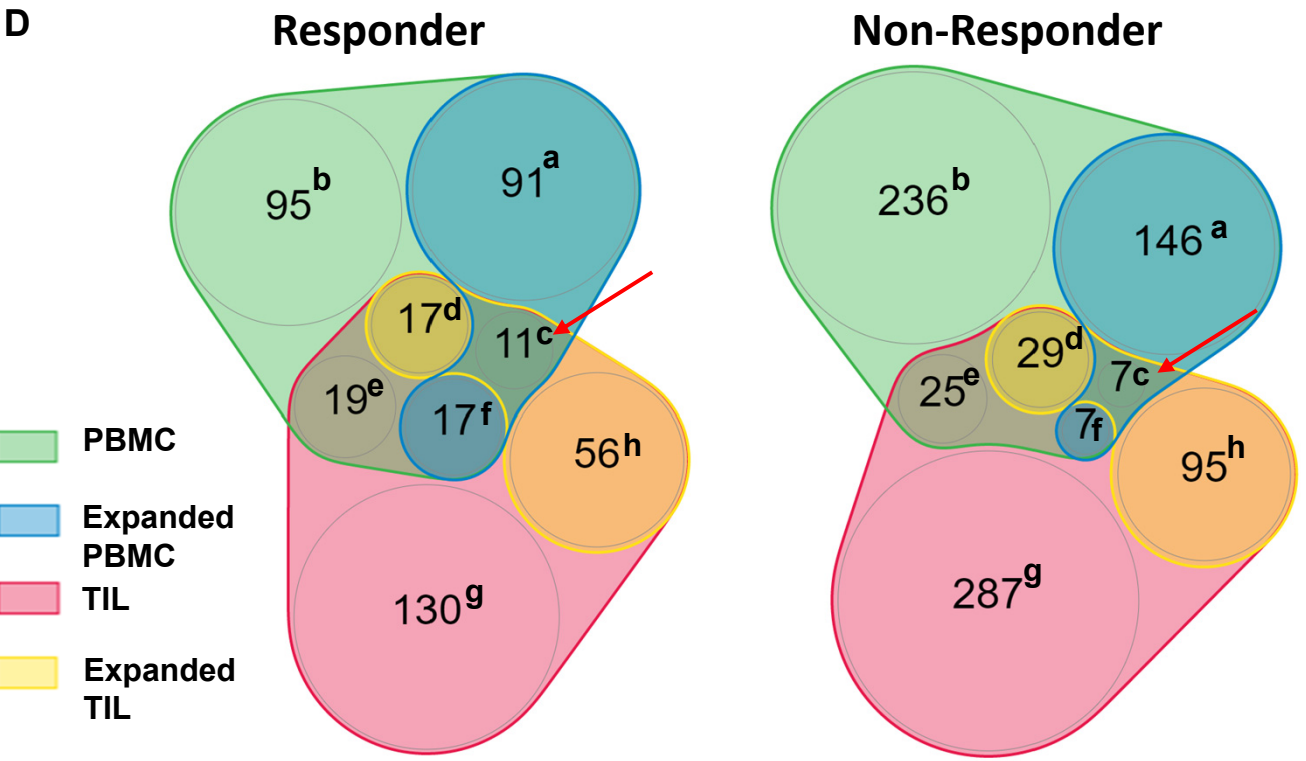

Supplemental Figure 4

**Supplemental Figure 4. Overlapping expanded top 50 TCR clonotypes between TIL and PBMC.** **(A)** Scheme for identification and comparison of overlapping expanded top 50 TCR clonotypes based on their ranking in pre-TIL and pre-PBMC. **(B)** Number of responders (n=5) or non-responders (n=9) containing or not containing an overlapping expanded top 50 TCR clonotype. Statistical difference was calculated with Fisher Exact Test (p=1). **(C)** Number of overlapping expanded vs. others in top 50 TCR clonotypes of responders (n=5) vs. non-responders (n=9). Others are counted as follows: the total number of top 50 TCR clonotypes in PBMC and TIL of responders (n=500) or non-responders (n=900) minus the number of clonotypes in category of c, d, e, and f and the number of clonotypes in category of c. Statistical difference was calculated with Chi-square test (p=0.03). **(D)** Number of TCR clonotypes in responders vs. non-responders distributed into 8 different categories **(a-h)** for expanding or overlapping conditions between PBMC and TIL. Annotation: **(a)** PBMC Expanded alone; **(b)** PBMC Nonexpanded; **(c)** PBMC Expanded & TIL Expanded; **(d)** PBMC Nonexpanded & TIL Expanded; **(e)** PBMC Nonexpanded & TIL Nonexpanded; **(f)** PBMC Expanded & TIL Nonexpanded; **(g)** TIL Nonexpanded; **(h)** TIL Expanded alone.
