# Supplementary material
Source: PubMed Central journal article supplement (PMC9898159)
Supplement: NIHMS1859417-supplement-Supplemental_Tables.pdf [file NIHMS1859417-supplement-Supplemental_Tables.pdf]

**Supplemental Table 1. Nine treatment-expanded TCR clonotypes shared between PBMC and TILs in top 20 TCR clonotypes of pre-PBMC or pre-TIL**

| PX ID | CDR3 region amino_acid | pre_TIL_Freq | pre_TIL_Rank | post_TIL_Freq | post_TIL_Rank | Ratio_TIL | pre_PBMC_Freq | pre_PBMC_Rank | post_PBMC_Freq | post_PBMC_Rank | Ratio_PBMC |
|-------|------------------------|--------------|--------------|---------------|---------------|-----------|---------------|---------------|----------------|----------------|------------|
| 6     | CASSPPSRDYVSYEQYF      | 1.908%       | 3            | 2.263%        | 1             | 1.186     | 0.31%         | 8             | 0.409%         | 8              | 1.321      |
| 16    | CASTRTGYPAGPHNEQFF     | 1.033%       | 4            | 2.401%        | 3             | 2.324     | 2.432%        | 2             | 3.68%          | 2              | 1.513      |
| 16    | CASSLSGGGEQYF          | 0.302%       | 12           | 0.913%        | 8             | 3.027     | 0.194%        | 16            | 0.362%         | 10             | 1.871      |
| 24    | CASSSLRGPEDYGYTF       | 0.802%       | 1            | 3.142%        | 1             | 3.919     | 0.679%        | 2             | 1.222%         | 3              | 1.799      |
| 24    | CASSDRGDPSEPQHF        | 0.55%        | 7            | 0.799%        | 12            | 1.452     | 2.832%        | 1             | 3.549%         | 1              | 1.253      |
| 24    | CASSSHYPTDTQYF         | 0.345%       | 11           | 1.29%         | 7             | 3.736     | 0.287%        | 6             | 0.52%          | 5              | 1.814      |
| 24    | CAISDPRDSYEQYF         | 0.274%       | 13           | 0.825%        | 11            | 3.007     | 0.192%        | 11            | 0.224%         | 18             | 1.168      |
| 24    | CASSYSTSGQETQYF        | 0.154%       | 20           | 0.541%        | 17            | 3.507     | 0.184%        | 12            | 0.505%         | 6              | 2.736      |
| 27    | CASSFHAGAGNTIYF        | 0.668%       | 5            | 1.306%        | 6             | 1.955     | 0.629%        | 5             | 0.967%         | 6              | 1.537      |
| 27    | CASSPPTGAISYEQYF       | 0.339%       | 13           | 0.532%        | 23            | 1.568     | 0.221%        | 20            | 0.353%         | 13             | 1.593      |

Patient ID indicates the patient who harbors a shared expanded top TCR clonotype. Patient 6 is a non-responder and patient 16, 24, and 27 are responders (in red fonts).

**Supplemental Table 2. Eighteen treatment-expanded TCR clonotypes shared between PBMC and TILs in top 50 TCR clonotypes of pre-PBMC or pre-TIL**

| No | PX ID | CDR3 region amino_acid | pre_TIL_Freq | pre_TIL_Rank | post_TIL_Freq | post_TIL_Rank | Ratio_TIL | pre_PBMC_Freq | pre_PBMC_Rank | post_PBMC_Freq | post_PBMC_Rank | Ratio_PBMC |
|----|-------|------------------------|--------------|--------------|---------------|---------------|-----------|---------------|---------------|----------------|----------------|------------|
| 1  | 6     | CASSPPSRDYVSYEQYF      | 1.908%       | 3            | 2.263%        | 1             | 1.186     | 0.31%         | 8             | 0.409%         | 8              | 1.321      |
| 2  | 10    | CASSQDSGNSNQPQHF       | 0.529%       | 5            | 0.713%        | 11            | 1.349     | 0.061%        | 34            | 0.069%         | 29             | 1.119      |
| 3  | 13    | CAISTGDGNQPQHF         | 0.775%       | 2            | 1.444%        | 3             | 1.864     | 0.263%        | 24            | 0.284%         | 22             | 1.078      |
| 4  | 13    | CASSLEGQGVLPQHF        | 0.66%        | 4            | 1.735%        | 2             | 2.63      | 0.14%         | 36            | 0.16%          | 32             | 1.137      |
| 5  | 13    | CASSEGTSGSYEQYF        | 0.295%       | 15           | 0.384%        | 25            | 1.303     | 0.118%        | 41            | 0.206%         | 29             | 1.756      |
| 6  | 14    | CASETGFTGNTIYF         | 0.298%       | 21           | 0.87%         | 3             | 2.921     | 0.166%        | 33            | 0.343%         | 22             | 2.064      |
| 7  | 15    | CASSLSHDAFF            | 0.689%       | 20           | 0.887%        | 3             | 1.287     | 0.163%        | 23            | 0.183%         | 29             | 1.117      |
| 8  | 16    | CASTRTGYPAGPHNEQFF     | 1.033%       | 4            | 2.401%        | 3             | 2.324     | 2.432%        | 2             | 3.68%          | 2              | 1.513      |
| 9  | 16    | CASSLSGGGEQYF          | 0.302%       | 12           | 0.913%        | 8             | 3.027     | 0.194%        | 16            | 0.362%         | 10             | 1.871      |
| 10 | 24    | CASSSLRGPEDYGYTF       | 0.802%       | 1            | 3.142%        | 1             | 3.919     | 0.679%        | 2             | 1.222%         | 3              | 1.799      |
| 11 | 24    | CASSDRGDPSEPQHF        | 0.55%        | 7            | 0.799%        | 12            | 1.452     | 2.832%        | 1             | 3.549%         | 1              | 1.253      |
| 12 | 24    | CASSSHYPTDTQYF         | 0.345%       | 11           | 1.29%         | 7             | 3.736     | 0.287%        | 6             | 0.52%          | 5              | 1.814      |
| 13 | 24    | CAISDPRDSYEQYF         | 0.274%       | 13           | 0.825%        | 11            | 3.007     | 0.192%        | 11            | 0.224%         | 18             | 1.168      |
| 14 | 24    | CASSYSTSGQETQYF        | 0.154%       | 20           | 0.541%        | 17            | 3.507     | 0.184%        | 12            | 0.505%         | 6              | 2.736      |
| 15 | 27    | CASSFHAGAGNTIYF        | 0.668%       | 5            | 1.306%        | 6             | 1.955     | 0.629%        | 5             | 0.967%         | 6              | 1.537      |
| 16 | 27    | CASSPPTGAISYEQYF       | 0.339%       | 13           | 0.532%        | 23            | 1.568     | 0.221%        | 20            | 0.353%         | 13             | 1.593      |
| 17 | 27    | CASSYGGSYEQYF          | 0.174%       | 26           | 0.286%        | 41            | 1.64      | 0.162%        | 25            | 0.211%         | 22             | 1.296      |
| 18 | 27    | CASSVDIQQPQHF          | 0.135%       | 44           | 0.177%        | 60            | 1.313     | 0.087%        | 47            | 0.094%         | 39             | 1.082      |

**Patient ID indicates the patient who harbors a shared expanded top TCR clonotype. Patient 6, 10, 13, 14 and 15 are non-responders and patient 16, 24, and 27 are responders (in red fonts).**
